# Supplementary material for: Production of Astaxanthin by Animal Cells via Introduction of an Entire Astaxanthin Biosynthetic Pathway
Source: MDPI journal article supplement (doi:10.3390/bioengineering10091073), 2023-09-11
Supplement: s1 [file s1]

- **RP-HPLC chromatogram of ketocarotenoids for HEK293T cell extracts**

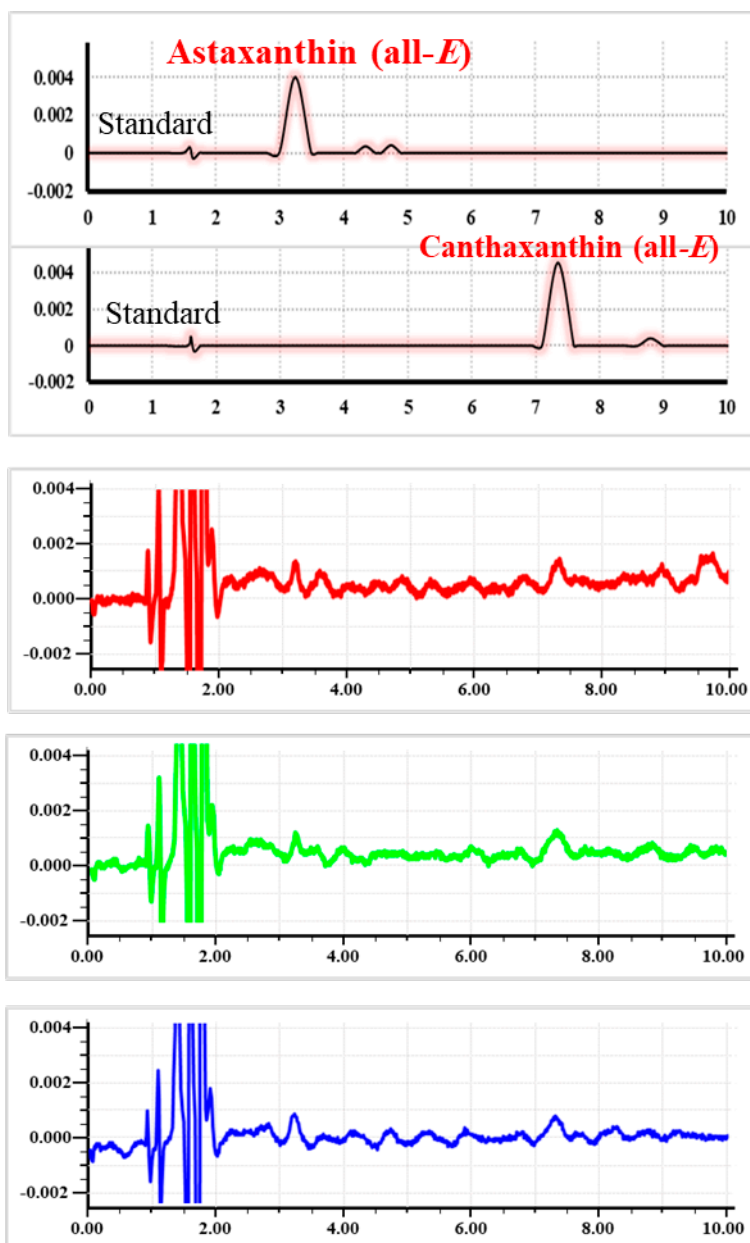

**1- pWZG-2A+beta-carotene**

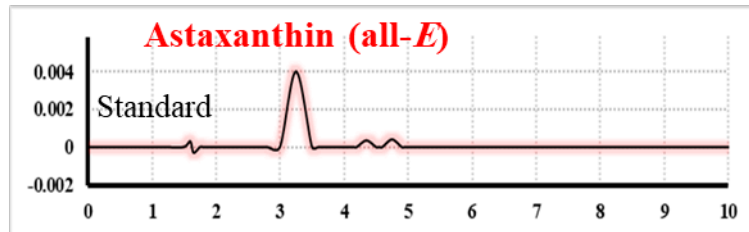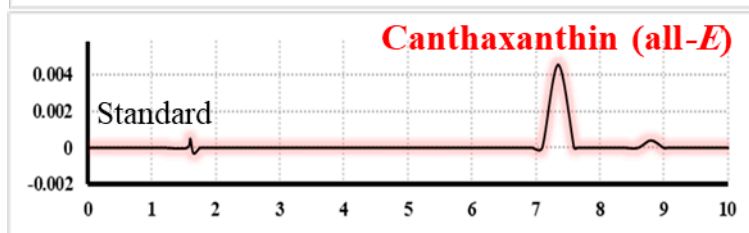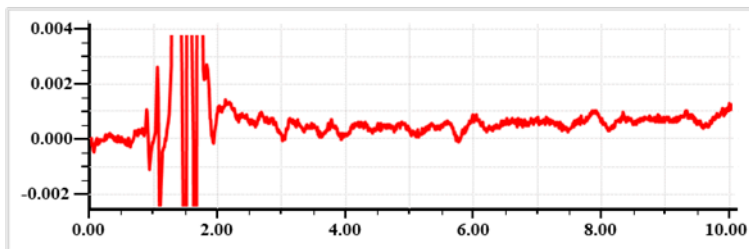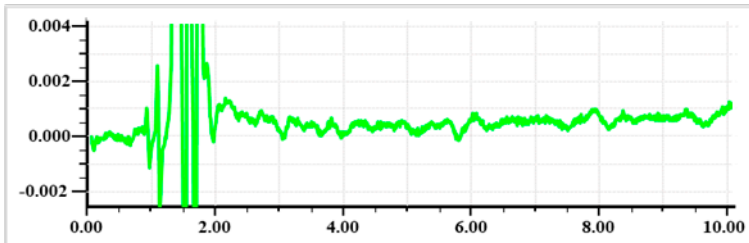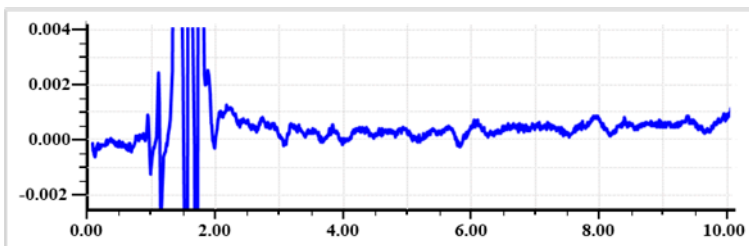

**2- pbK3HZ-2A+beta-carotene**

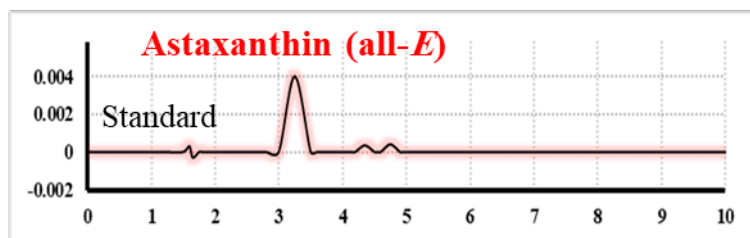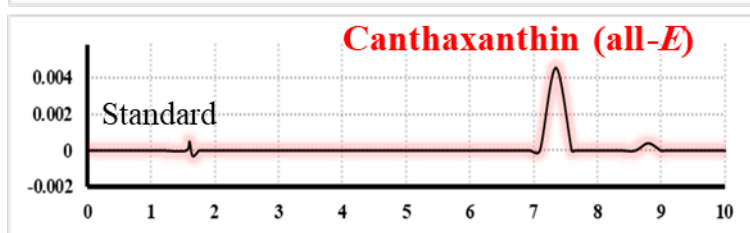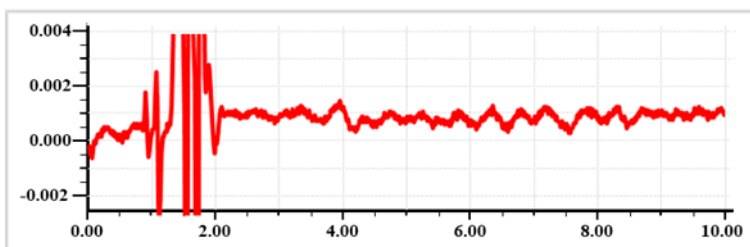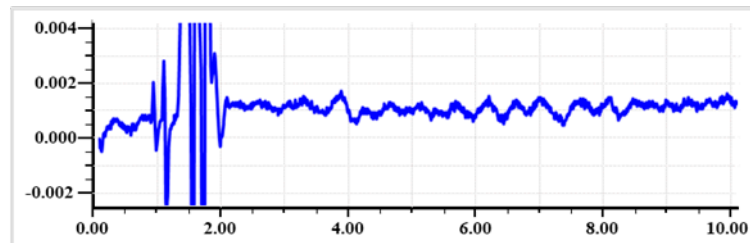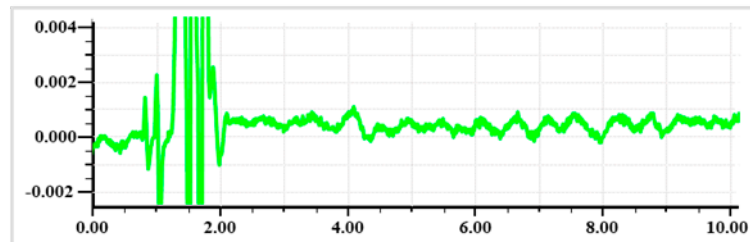

**3- pC1HZG-2A+beta-carotene**

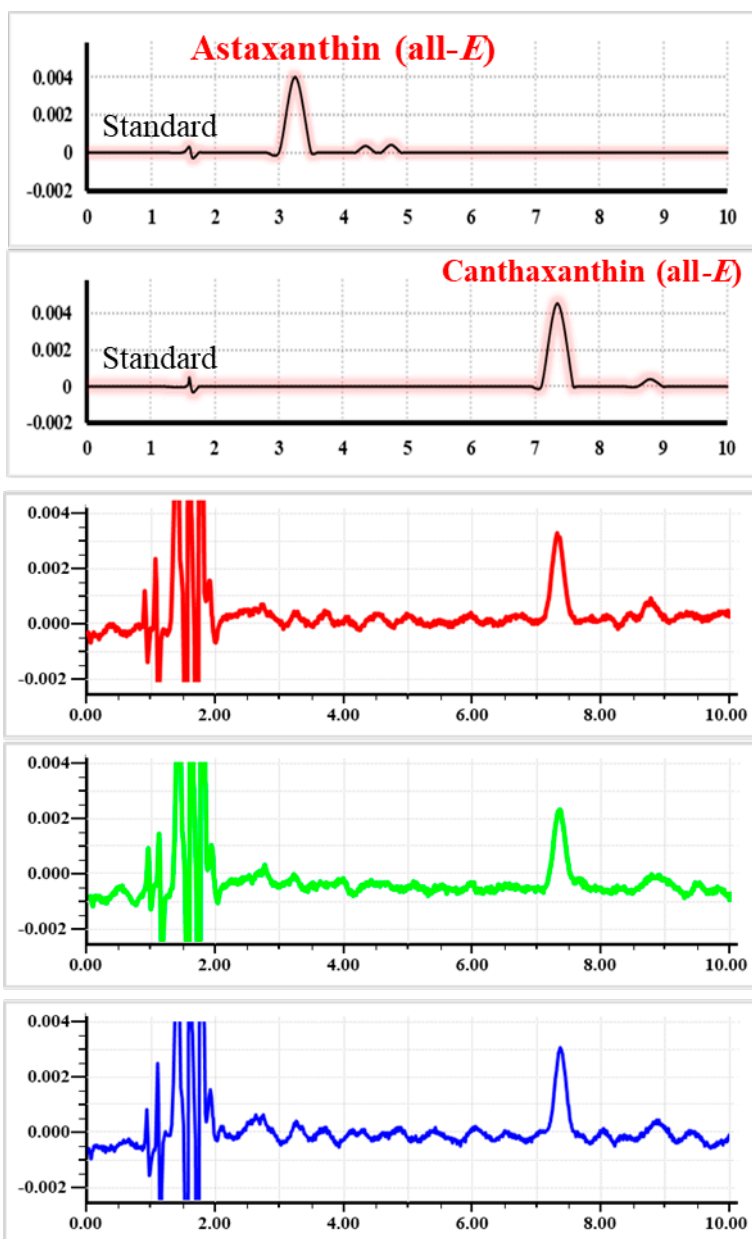

**4- pWZg1R-2A+beta-carotene**

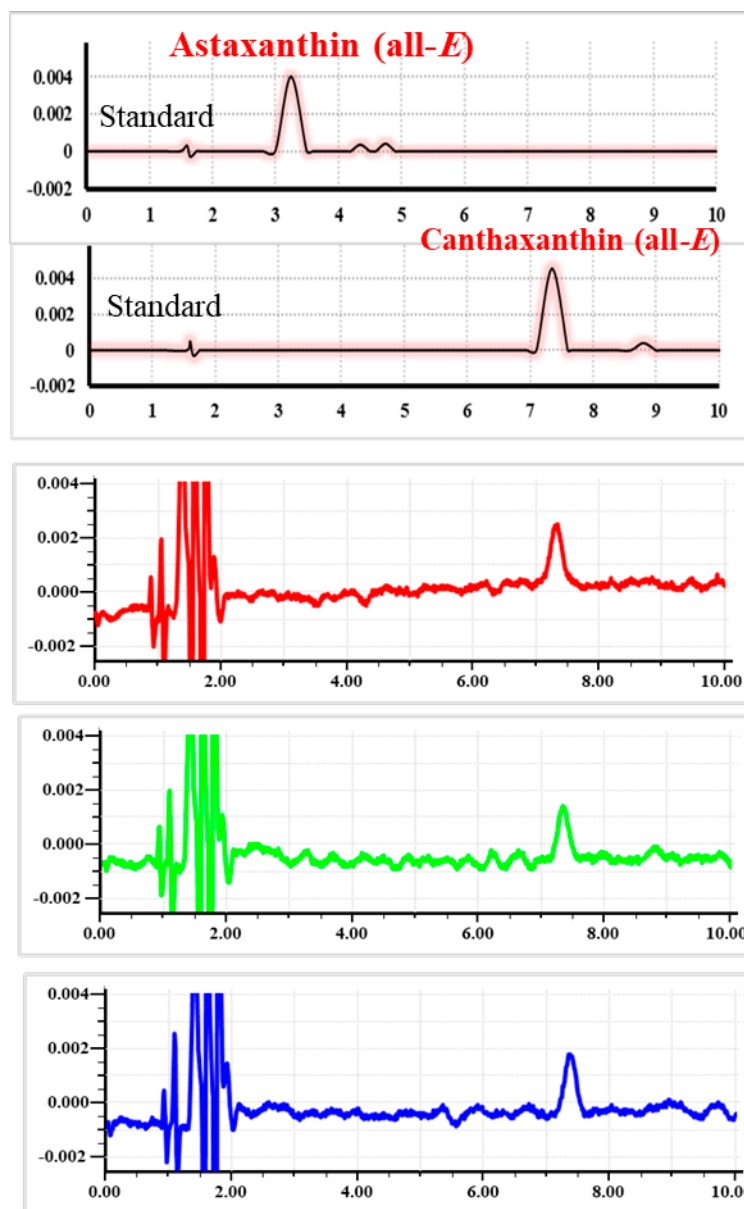

**5- pWZg2R-2A+beta-carotene**

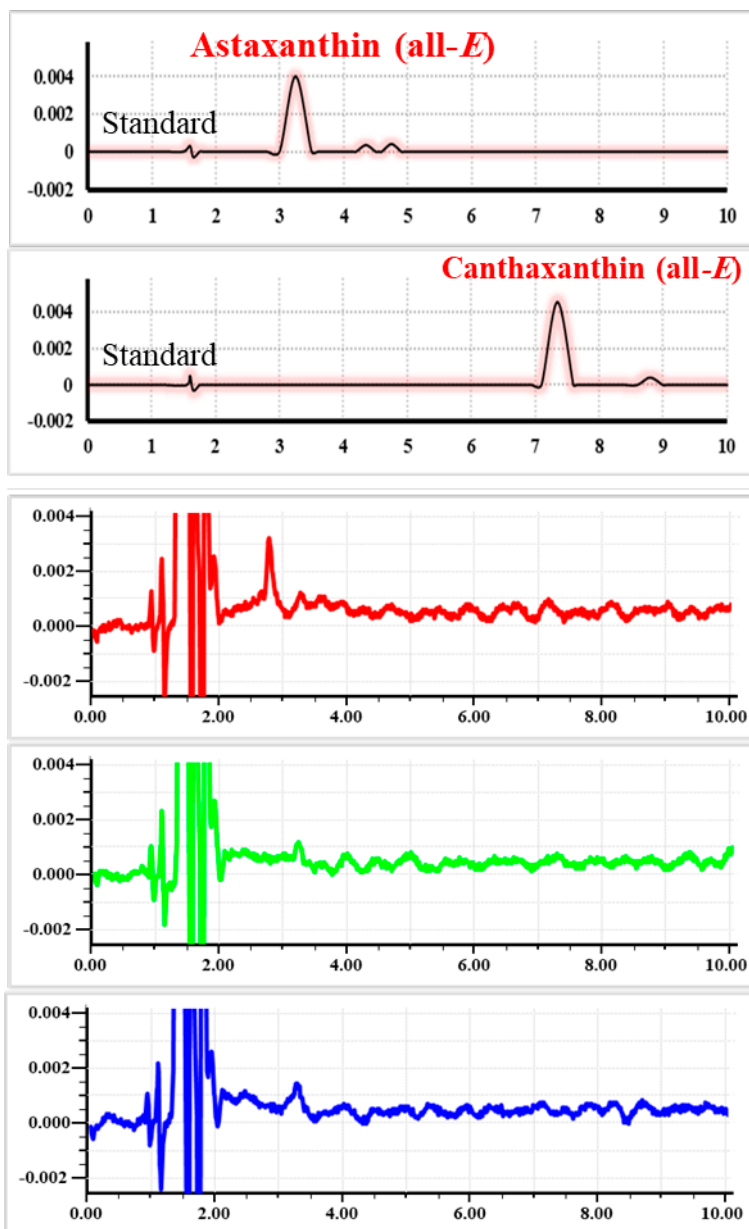

**6- pPLXG+pWZg1R**

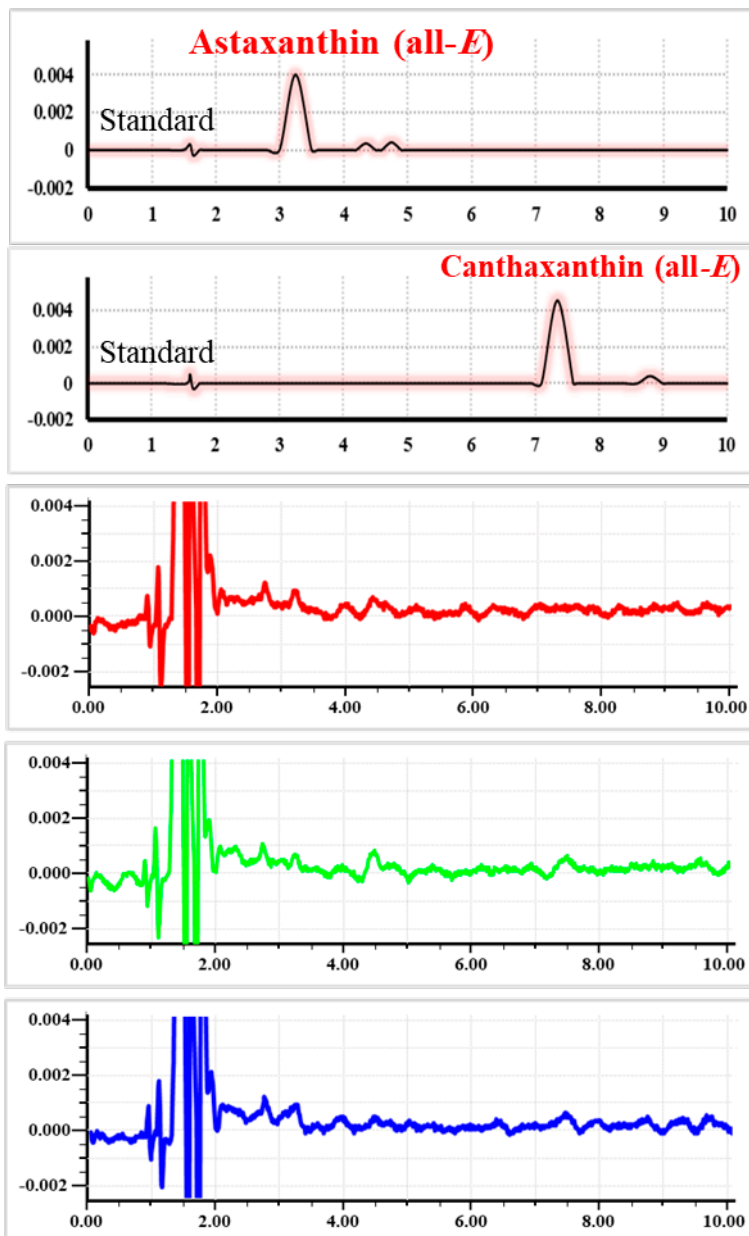

7- pAPLG+pWZg1R

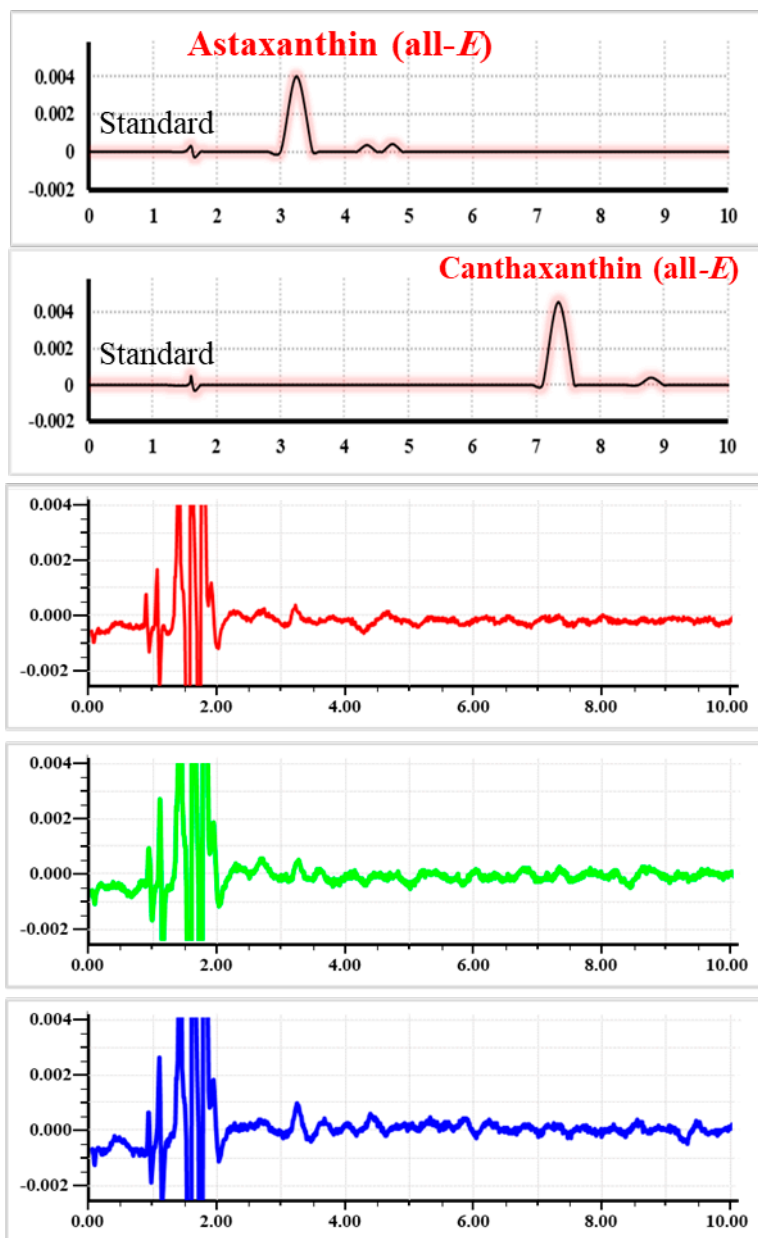

**8- pPYLG+pWZg1R**



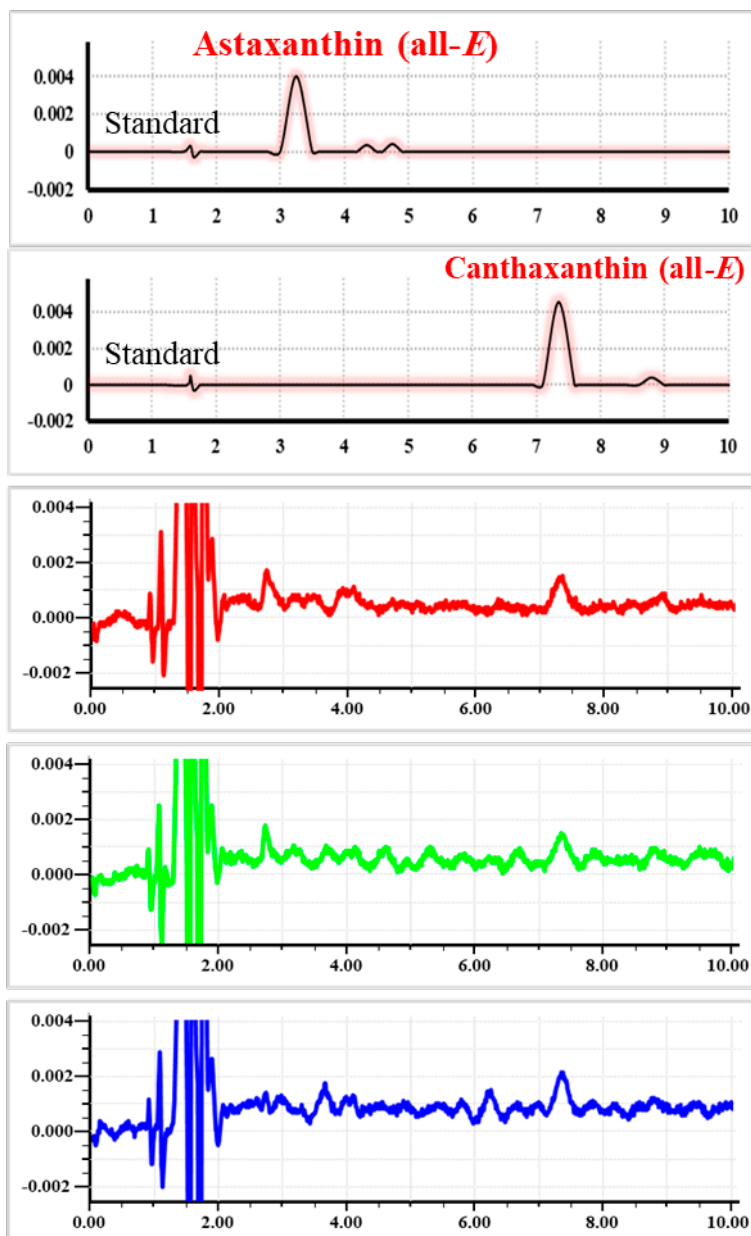

**9- pPLXG+pWZg1R+GGPP**

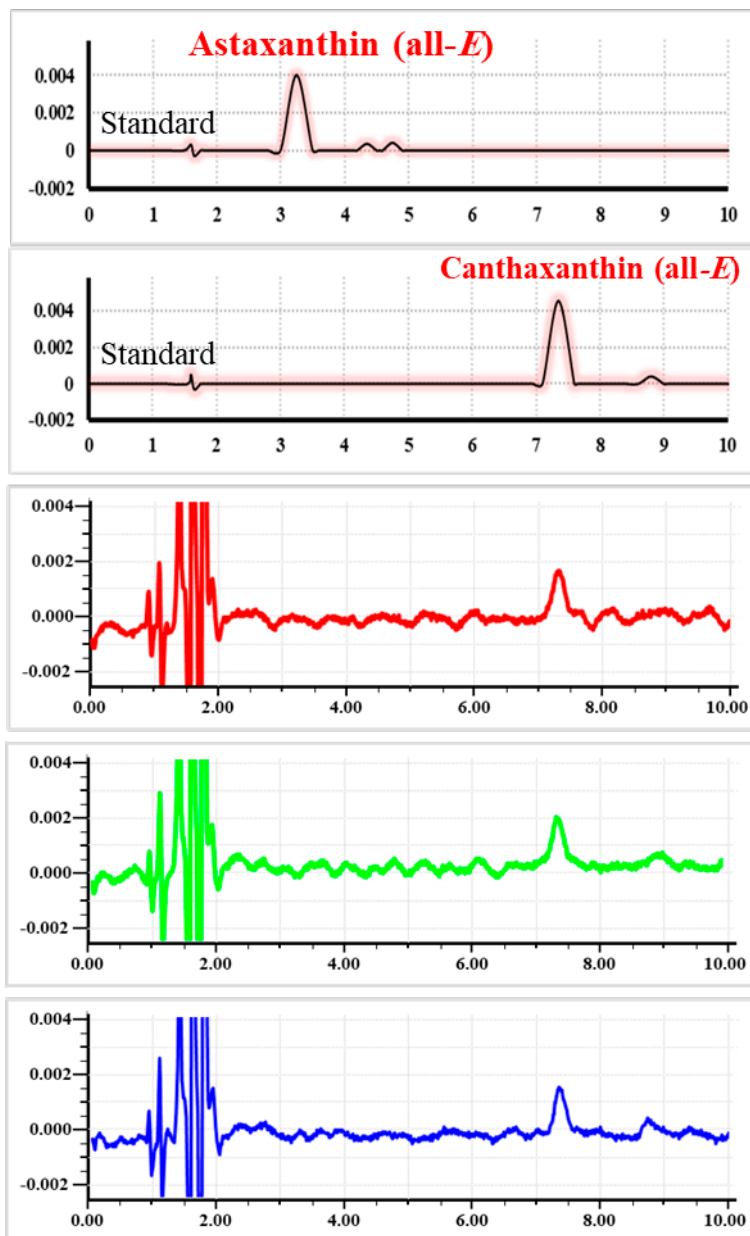

10- pAPLG+pWZg1R+GGPP

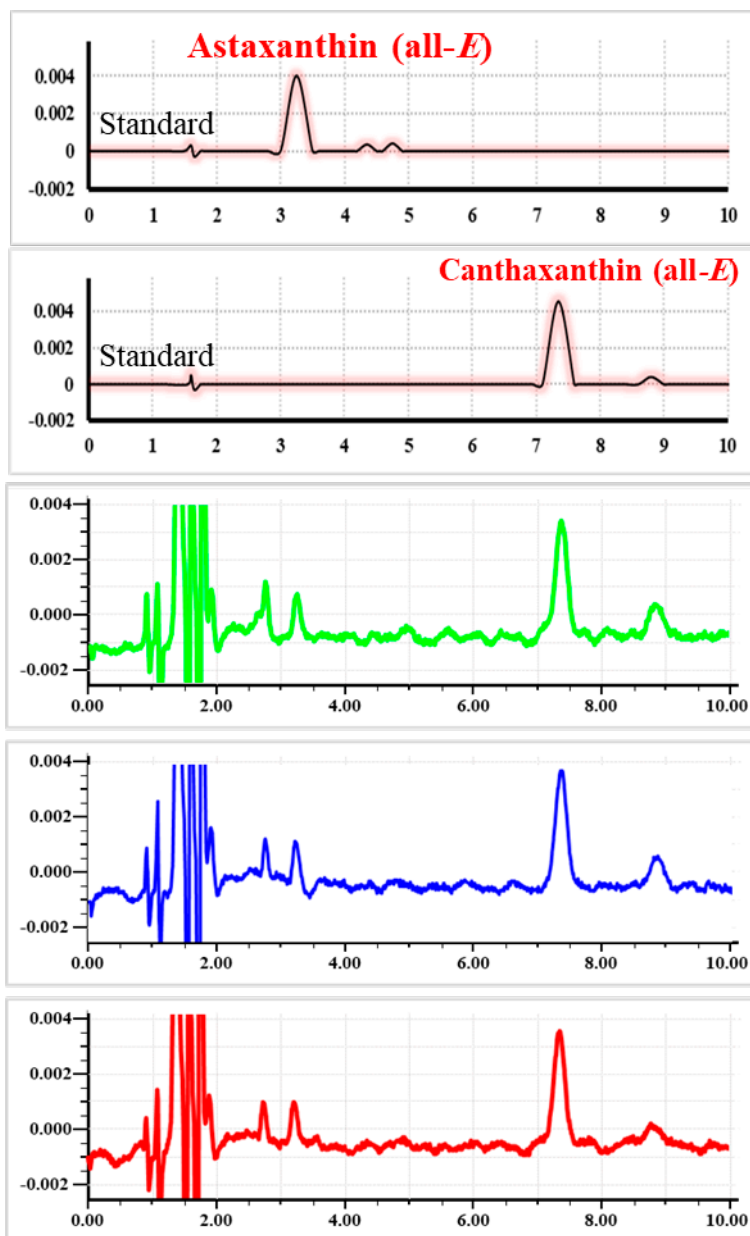

11- pPYLG+pWZg1R+GGPP

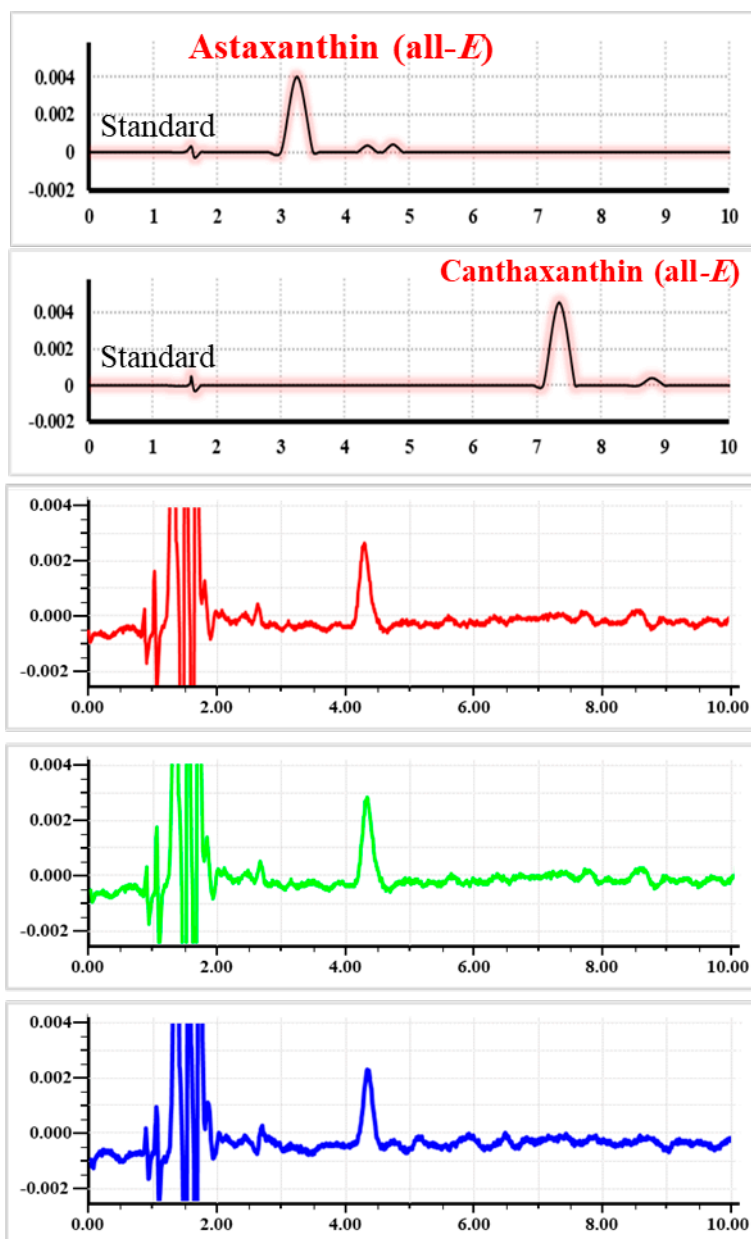

12- pPLXG+pWZg1R+ZR+GGPP

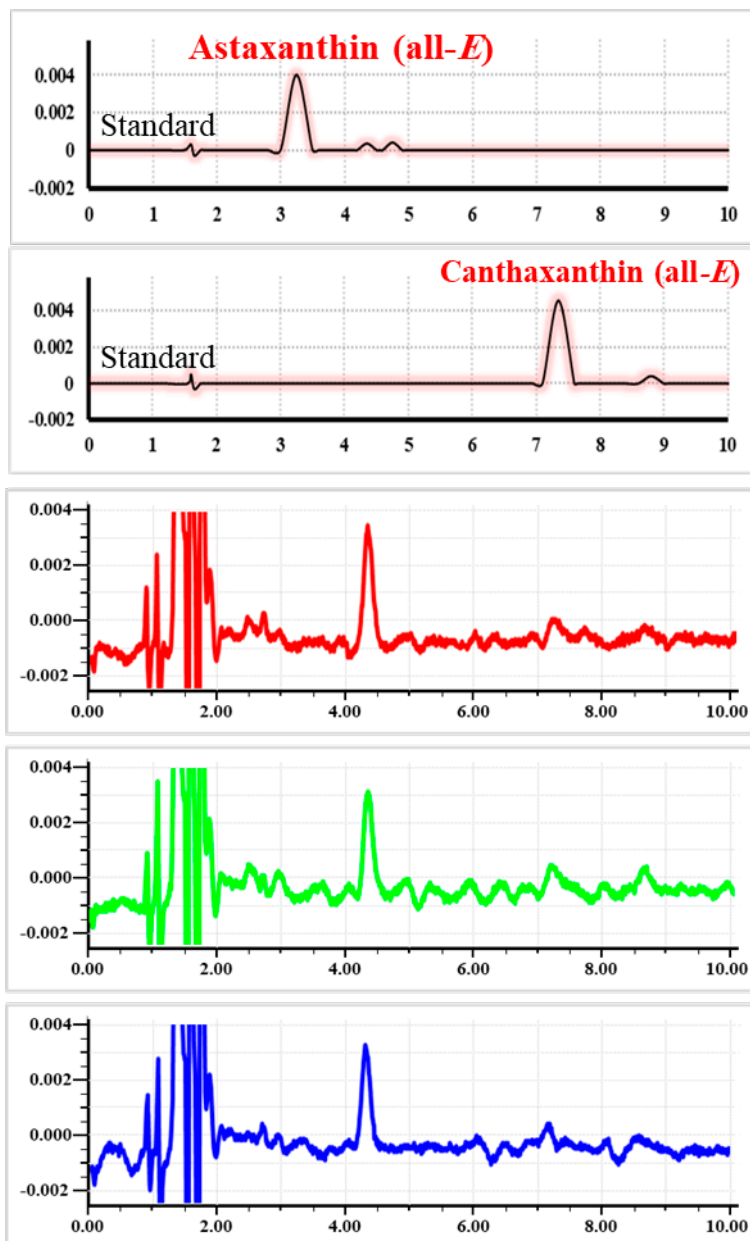

**13- pAPLG+pWZg1R+ZR+GGPP**

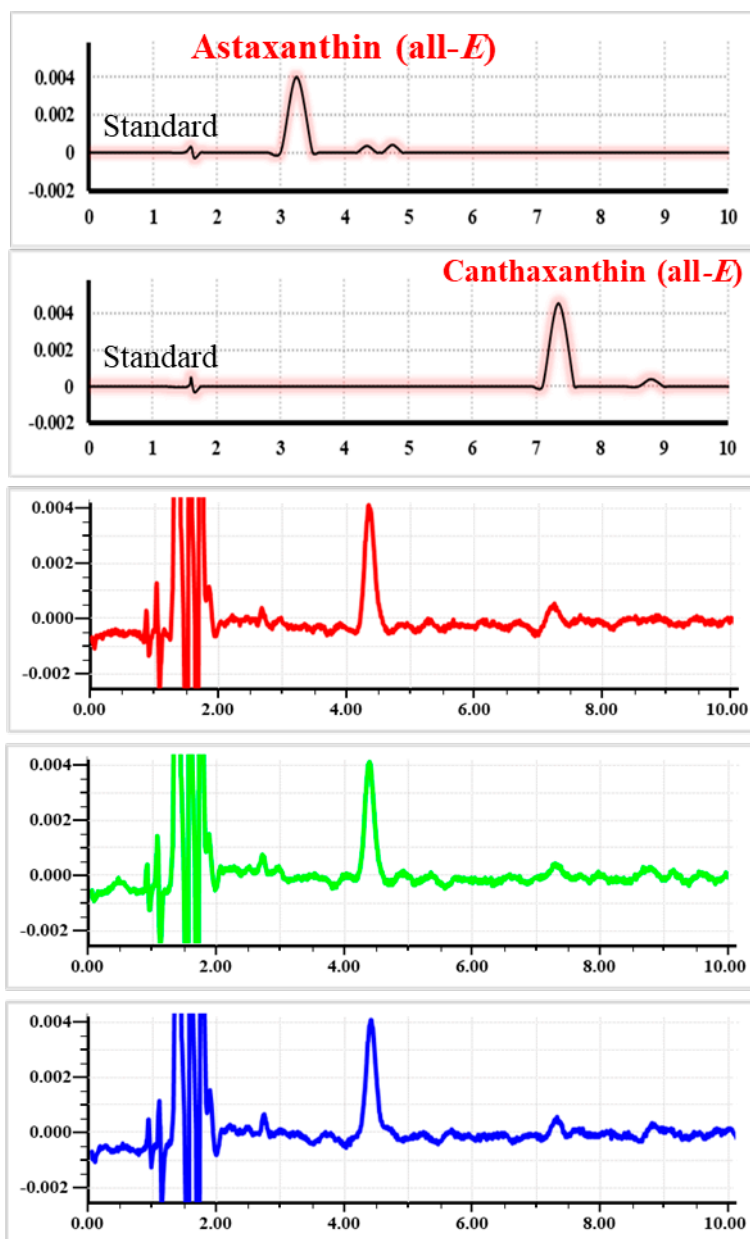

**14- pPYLG+pWZg1R+ZR+GGPP**
