# Supplementary material for: Production of Astaxanthin by Animal Cells via Introduction of an Entire Astaxanthin Biosynthetic Pathway
Source: MDPI journal article supplement (doi:10.3390/bioengineering10091073), 2023-09-11
Supplement: s1 [file s1]

## List of synthetic genes and plasmids involved in the study:

### 1. *bkt3* gene (GenBank: AY603347) from *Haematococcus pluvialis*;

---

#### Primers

#### Forward

CCATCGATATGCACGTGGCTAGCGCTCT

#### Reverse

CCCAAGCTTAGCCAGAGCAGGCACCAGT

---

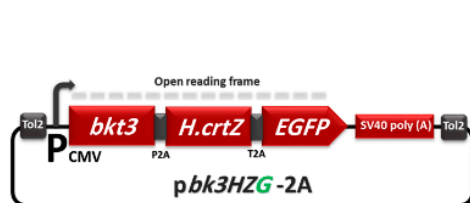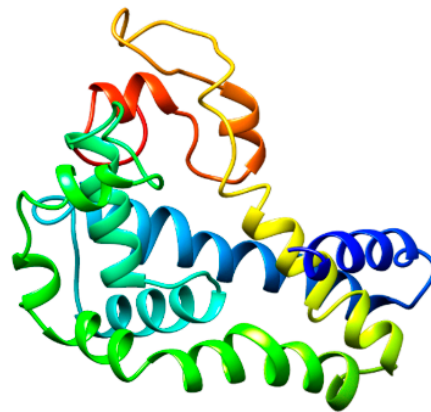

2. *H-crtZ* gene (GenBank: AY187011) from *Haematococcus pluvialis*

|         |                                                      |
|---------|------------------------------------------------------|
| Primers |                                                      |
| Forward | CCCAAGCTTGGATCCGGAGCCACGAACTTCTCTCTGTTAAAGCAAGCAGGAG |
| Reverse | ACGTGGAAGAAAACCCCGGTCCTCTCAGCAAGCTGCAGAGCAT          |
|         | CGGAATTCTCTTTTGCTCCAGTCCAGTT                         |

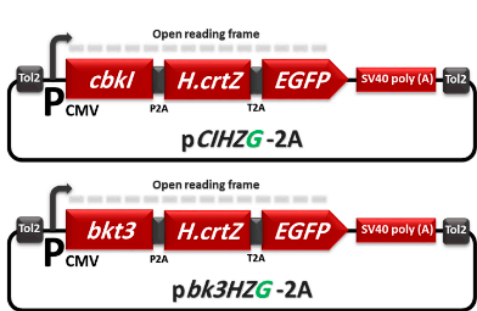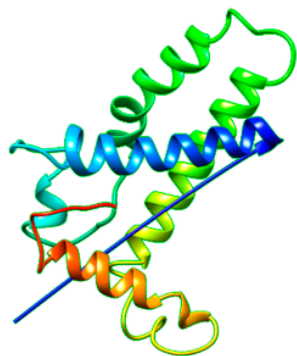

### 3. *CBK1* gene (RefSeq: XM\_001698647) from *Chlamydomonas reinhardtii*

---

#### Primers

##### Forward

CCATCGATATGGGACCTGGAATCCAGCCGA

##### Reverse

CCCAAGCTTAGCCATAACCCCCACAGGA

---

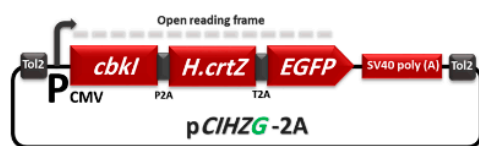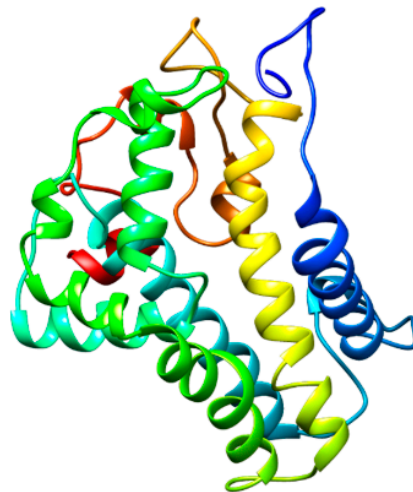

#### 4. *DGTT1* gene (GenBank: MN561785.1) from *Haematococcus lacustris*

---

##### Primers

##### Forward

GGACTAGTGGATCCGGAGAGGGCAGGGGAAGTCTTCTAACATGCGGGGACGTGGA  
GGAAAATCCCGGCCCCAGAATCATGCCCTGGCCTTT

##### Reverse

CCGCTCGAGGATCACGATTCCAGAGCTTGT

---

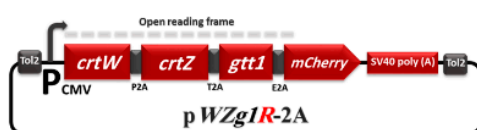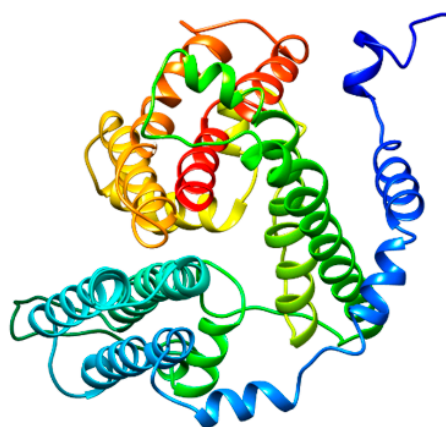

5. *psy1* gene (GenBank: FJ971252.1) from *Zea mays subsp*

|         |                                                           |
|---------|-----------------------------------------------------------|
| Primers |                                                           |
| Forward | CCATCGATatggcaatcatcctggtgaga                             |
| Reverse | CCCAAGCTTTGTCTGTCCGTTTCTCAGGCT                            |
| Primers |                                                           |
|         | CCCAAGCTTGGATCCGGAGCCACGAACTTCTCTCTGTTAAAGCAAGCAGGAGACGTG |
|         | GAAGAAAACCCCGGTCCTATGGCAATCATCCTGGTGAGA                   |
| Forward | CGGAATTCTCATGTCTGTCCGTTTCTCAG                             |

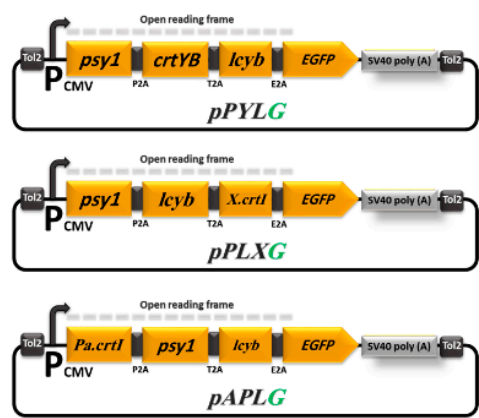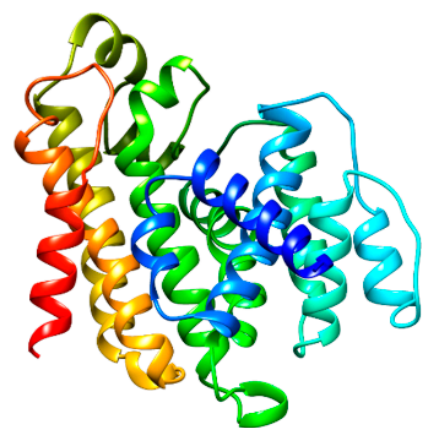

6. *lcyb* gene (GenBank: KX424526.1) from *Haematococcus lacustris*

|         |                                                                                           |
|---------|-------------------------------------------------------------------------------------------|
| Primers |                                                                                           |
| Forward | CGGAATTCGAGGGCAGGGGAAGTCTTCTAACATGCGGGGACGTGGAGGAAAATCCC<br>GGCCCCATGCTGAGCCCTCTGCAGAGACT |
| Reverse | CGGGATCCTCACTTGATCATAGCGGGTGGG                                                            |

|         |                                                                                                    |
|---------|----------------------------------------------------------------------------------------------------|
| Forward | CCCAAGCTTGGATCCGGAGCCACGAATTCTCTCTGTTAAAGCAAGCAGGAGACGTG<br>GAAGAAAACCCCGTCCTATGCTGAGCCCTCTGCAGAGA |
| Reverse | CGGAATTCTCACTTGATCATAGCGGGTGG                                                                      |

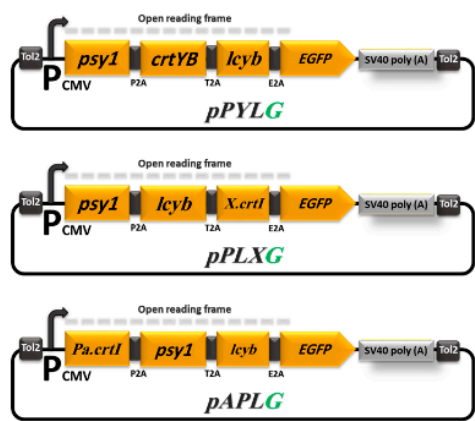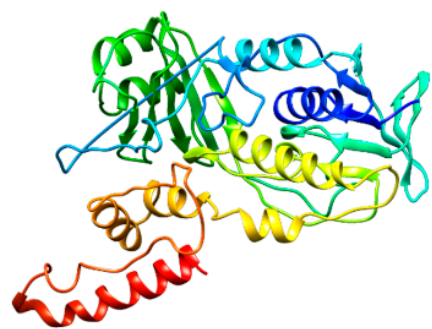

## 7. *Pa-crtI* gene (GenBank: D90087.2) from *Pantoea ananatis*

---

### Primers

#### Forward

ccatcgatatgaagcccacaaccgtgatc

#### Reverse

CCCAAGCTTTCAGATCAGGTCTTCCAGCAT

---

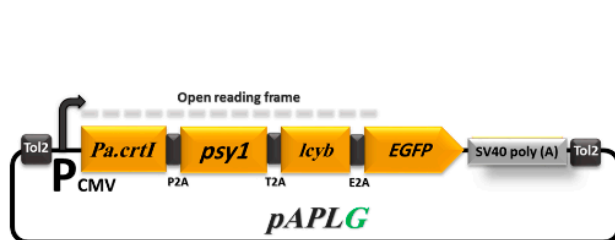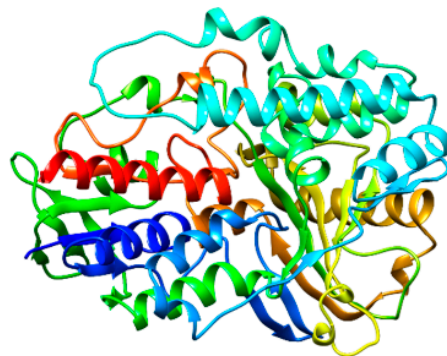

8. *Xd-crtI* gene (GenBank: KR779666.1) from *Xanthophyllomyces dendrorhous*,

---

Primers

Forward

CGGAATTCGAGGGCAGGGGAAGTCTTCTAACATGCGGGGACGTGGAGG  
AAAATCCCGGCCCATGGGAAAGGAGCAGGACCAGGA

Reverse

CGGGATCCTCAGAAAGCCAGCACTCCCAC

---

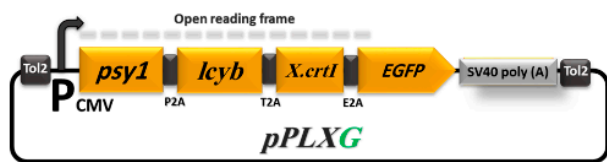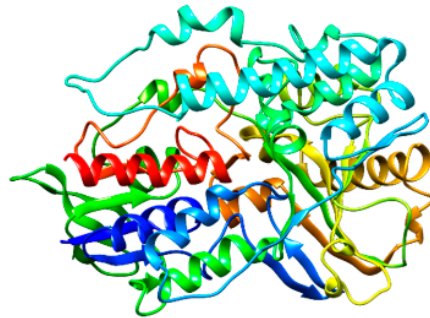



9. crtYB gene (GenBank: AY177204.1) from Xanthophyllomyces dendrorhous

|         |                                                                                                    |
|---------|----------------------------------------------------------------------------------------------------|
| Primers |                                                                                                    |
| Forward | CCCAAGCTTggatccggagccacgaacttctctctgttaaagcaagcaggagacgtggaagaaaacccggt<br>cctacagccctggcctactacca |
| Reverse | CGGAATTCCTGTCCCTCCCATCCACTCA                                                                       |

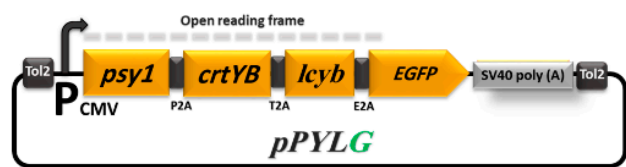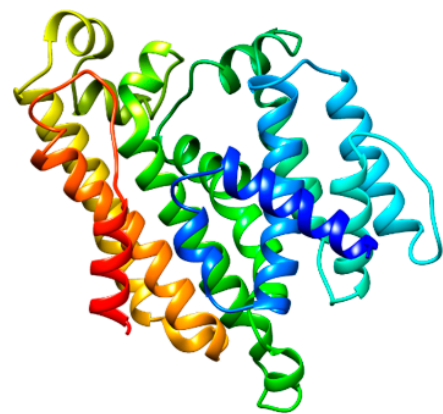

## 10. Self-cleaving 2A peptides coding sequence:

- **P2A peptides**

GGATCCGGAGCCACGAACTTCTCTCTGTAAAGCAAGCAGGAGACGTGGAAGAAAACC  
CCGGT **CCT**

GSGATNFSLLKQAGDVEENPG **P**

- **T2A peptides**

GGATCCGGAGAGGGCAGGGGAAGTCTTCTAACATGCGGGGACGTGGAGGAAAATCCCG  
GC **CCC**

GSGEGRGSLLTCGDVEENPG **P**

- **E2A peptides**

GGATCCGGACAGTGTACTAATTATGCTCTCTTGAAATTGGCTGGAGATGTTGAGAGCAAC  
CCAGGT **CCC**

GSGQCTNYALLKLAGDVESNPG **P**
