# Supplementary material for: Production of Astaxanthin by Animal Cells via Introduction of an Entire Astaxanthin Biosynthetic Pathway
Source: MDPI journal article supplement (doi:10.3390/bioengineering10091073), 2023-09-11
Supplement: s1 [file s1]

**Table S3.** Compositions and contents of total canthaxanthin in HEK293T cells. Data ( $\mu\text{g/g}$  DW, gram of dry weight).

| Samples                        | CAN-E              | CAN-Z              | TOTLA-CAN          | MIN-Total-CAN      | SD   | Compared to             | One way ANOVA, <i>P-values</i> |
|--------------------------------|--------------------|--------------------|--------------------|--------------------|------|-------------------------|--------------------------------|
|                                | $\mu\text{g/g}$ DW | $\mu\text{g/g}$ DW | $\mu\text{g/g}$ DW | $\mu\text{g/g}$ DW |      |                         |                                |
| <b>pbK3HZ-2A+beta-carotene</b> | 39.6               | ND                 | 39.6               | 37.1               | 2.4  | pWZG-2A+beta-carotene   |                                |
|                                | 34.8               | ND                 | 34.8               |                    |      |                         |                                |
|                                | 36.9               | ND                 | 36.9               |                    |      |                         |                                |
| <b>pC1HZG-2A+beta-carotene</b> | 37.2               | ND                 | 37.2               | 37.8               | 8.0  | pbK3HZ-2A+beta-carotene | *                              |
|                                | 32.0               | 14.2               | 46.1               |                    |      |                         |                                |
|                                | 30.1               | ND                 | 30.1               |                    |      |                         |                                |
| <b>pWZG-2A+beta-carotene</b>   | 42.3               | ND                 | 42.3               | 42.6               | 1.5  | pbK3HZ-2A+beta-carotene | ***                            |
|                                | 41.3               | ND                 | 41.3               |                    |      |                         |                                |
|                                | 44.2               | ND                 | 44.2               |                    |      |                         |                                |
| <b>pWZg2R-2A+beta-carotene</b> | 25.1               | 32.6               | 57.6               | 57.9               | 0.6  | pWZG-2A+beta-carotene   |                                |
|                                | 25.6               | 32.9               | 58.5               |                    |      |                         |                                |
|                                | 24.2               | 33.2               | 57.5               |                    |      |                         |                                |
| <b>pWZg1R-2A+beta-carotene</b> | 83.6               | 31.6               | 115.2              | 106.1              | 12.0 | pWZG-2A+beta-carotene   | ***                            |
|                                | 81.7               | 29.0               | 110.6              |                    |      |                         |                                |
|                                | 92.5               | ND                 | 92.5               |                    |      |                         |                                |
| <b>pPLXG+pWZg1R</b>            | 20.2               | ND                 | 20.2               | 21.8               | 1.3  | pPYLG+pWZg1R            |                                |
|                                | ND                 | 22.7               | 22.7               |                    |      |                         |                                |
|                                | 22.3               | ND                 | 22.3               |                    |      |                         |                                |
| <b>pAPLG+pWZg1R</b>            | ND                 | 17.5               | 17.5               | 20.3               | 2.5  | pPLXG+pWZg1R            |                                |
|                                | 11.8               | 10.3               | 22.1               |                    |      |                         |                                |
|                                | 21.5               | ND                 | 21.5               |                    |      |                         |                                |
| <b>pPYLG+pWZg1R</b>            | 19.0               | ND                 | 19.0               | 21.4               | 2.1  | pPLXG+pWZg1R            |                                |
|                                | 22.1               | ND                 | 22.1               |                    |      |                         |                                |
|                                | 23.0               | ND                 | 23.0               |                    |      |                         |                                |
| <b>pPLXG+pWZg1R+GGPP</b>       | 21.3               | 37.4               | 58.8               | 55.4               | 3.5  | pPLXG+pWZg1R            |                                |
|                                | 37.2               | 14.6               | 51.8               |                    |      |                         |                                |
|                                | 15.0               | 40.5               | 55.5               |                    |      |                         |                                |
| <b>pAPLG+pWZg1R+GGPP</b>       | 19.5               | 67.0               | 86.5               | 81.2               | 5.1  | pAPLG+pWZg1R            | *                              |
|                                | 38.9               | 37.4               | 76.3               |                    |      |                         |                                |
|                                | 44.9               | 35.8               | 80.8               |                    |      |                         |                                |
| <b>pPYLG+pWZg1R+GGPP</b>       | 133.0              | 20.6               | 153.5              | 153.1              | 0.5  | pPYLG+pWZg1R            | ***                            |
|                                | 124.6              | 28.7               | 153.3              |                    |      |                         |                                |
|                                | 114.0              | 38.5               | 152.5              |                    |      |                         |                                |
| <b>pPLXG+pWZg1R+ZR+GGPP</b>    | 8.7                | ND                 | 8.7                | 8.2                | 1.2  | pPLXG+pWZg1R            | ***                            |
|                                | 9.1                | ND                 | 9.1                |                    |      |                         |                                |
|                                | 6.8                | ND                 | 6.8                |                    |      |                         |                                |
| <b>pAPLG+pWZg1R+ZR+GGPP</b>    | 56.9               | ND                 | 56.9               | 59.2               | 8.0  | pAPLG+pWZg1R            | **                             |
|                                | 52.6               | ND                 | 52.6               |                    |      |                         |                                |

|                             |      |      |      |      |     |              |    |
|-----------------------------|------|------|------|------|-----|--------------|----|
|                             | 68.1 | ND   | 68.1 |      |     |              |    |
| <b>pPYLG+pWZg1R+ZR+GGPP</b> | 23.7 | 4.0  | 27.7 | 29.3 | 2.0 | pPYLG+pWZg1R | ** |
|                             | 20.1 | 11.4 | 31.5 |      |     |              |    |
|                             | 28.7 | ND   | 28.7 |      |     |              |    |

P < 0.05, P < 0.01 and P < 0.001 are tagged as \*, \*\*, and \*\*\*, respectively. ND, not detectable. The canthaxanthin is the sum of E (*trans*) and Z (*cis*) isomers.
