# Supplementary material for: Production of Astaxanthin by Animal Cells via Introduction of an Entire Astaxanthin Biosynthetic Pathway
Source: MDPI journal article supplement (doi:10.3390/bioengineering10091073), 2023-09-11
Supplement: s1 [file s1]

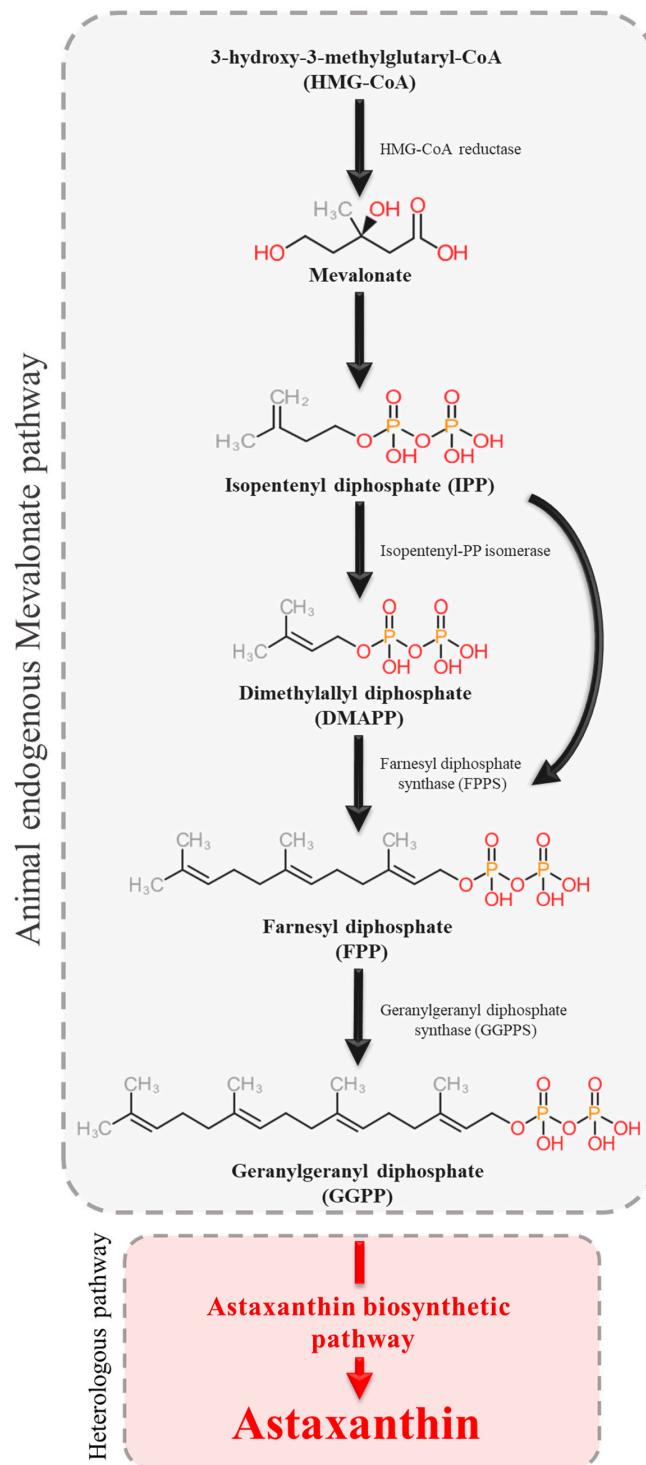

**Fig S2.** Animal endogenous mevalonate pathway and GGPP flux redirection toward astaxanthin accumulation in HEK293T cells.
