# Supplementary material for: Production of Astaxanthin by Animal Cells via Introduction of an Entire Astaxanthin Biosynthetic Pathway
Source: MDPI journal article supplement (doi:10.3390/bioengineering10091073), 2023-09-11
Supplement: s1 [file s1]

**Table S1.** Details of primers and plasmids used in this study

| Plasmid Name | Backbone                                       | References          | Primer          | Primer sequence                                                                                   | Plasmid map                                                                          |                                                                                     |
|--------------|------------------------------------------------|---------------------|-----------------|---------------------------------------------------------------------------------------------------|--------------------------------------------------------------------------------------|-------------------------------------------------------------------------------------|
| pWZG-2A      | pTol2-CMV-SV40 poly(A); CMV: EGFP-SV40 poly(A) | (Pang et al., 2014) | <i>F..crtW</i>  | CCATCGATATGACCGCTGCTGTGGCTGAG                                                                     | 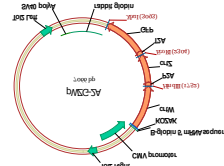  |                                                                                     |
|              |                                                |                     | <i>R.crtW</i>   | CCCAAGCTTGCTCTCTCCTCTCCACAGTCT                                                                    |                                                                                      |                                                                                     |
|              |                                                |                     | <i>F.crtZ</i>   | CCCAAGCTTGGATCCGGAGCCACGAACTTC TCTCTGTAAAGCAAGCAGGAGACGTGGAA GAAAACCCCGGTCCTGCCTGGCTGACTTGGA TCGC |                                                                                      |                                                                                     |
|              |                                                |                     | <i>R.crtZ</i>   | CGGAATTCAGCTCCGCTGCTAGAAGATCCT                                                                    |                                                                                      |                                                                                     |
| pWZg1R       |                                                |                     | <i>R.Gtt.2</i>  | CCATCGATCTGGATCTCCAGTGGCTTGT                                                                      |   |                                                                                     |
|              |                                                |                     | <i>F.Gtt.2</i>  | CGGAATTCGGATCCGGAGAGGGCAGGGGAA GTCTTCTAACATGCGGGGACGTGGAGGAAAA TCCCGGCCCCGGAGTGGCTACAAACGCTACA    |                                                                                      |                                                                                     |
| pWZg2R       |                                                |                     | <i>F.Gtt.1</i>  | GGACTAGTGGATCCGGAGAGGGCAGGGGAA GTCTTCTAACATGCGGGGACGTGGAGGAAAA TCCCGGCCCCAGAATCATGCCCTGGCCTTT     |                                                                                      |  |
|              |                                                |                     | <i>R.Gtt.1</i>  | CCGCTCGAGGATCACGATTCCAGAGCTTGT                                                                    |                                                                                      |                                                                                     |
| pbK3HZ-2A    |                                                |                     | <i>F. bkt3</i>  | CCATCGATATGCACGTGGCTAGCGCTCT                                                                      |  |                                                                                     |
|              |                                                |                     | <i>R. bkt3</i>  | CCCAAGCTTAGCCAGAGCAGGCACCAGT                                                                      |                                                                                      |                                                                                     |
|              |                                                |                     | <i>F.HcrtZ</i>  | CCCAAGCTTGGATCCGGAGCCACGAACTT CTCTCTGTAAAGCAAGCAGGAGACGTGG AAGAAAACCCCGGTCCTCTCAGCAAGCTG CAGAGCAT |                                                                                      |                                                                                     |
|              |                                                |                     | <i>R.H.crtZ</i> | CGGAATTCTCTTTTGCTCCAGTCCAGTT                                                                      |                                                                                      |                                                                                     |
| pC1HZG-2A    |                                                |                     | <i>F.Cbkt1</i>  | CCATCGATATGGGACCTGGAATCCAGCCGA                                                                    |                                                                                      |                                                                                     |
|              |                                                |                     | <i>R.Cbkt1</i>  | CCCAAGCTTAGCCATAACCCCCACAGGA                                                                      |                                                                                      |                                                                                     |
|              |                                                |                     | <i>F.GFP</i>    | CGGAATTCGGATCCGGAGAGGGCAGGGGA                                                                     |                                                                                      |                                                                                     |



|  |  |  |                   |                                                                                                                |  |
|--|--|--|-------------------|----------------------------------------------------------------------------------------------------------------|--|
|  |  |  | <i>F.Pa.Lcybl</i> | CGGAATTCGGATCCGGAGAGGGCAGGGGAA<br>GTCTTCTAACATGCGGGGACGTGGAGGAAAA<br>TCCCGGCCCCCTGAGCCCTCTGCAGAGACT            |  |
|  |  |  | <i>R.Pa.Lcybl</i> | CGGGATCCCTTGATCATAGCGGGTGGCA                                                                                   |  |
|  |  |  | <i>F.GFP</i>      | CGGGATCCCGGATCCGGACAGTGTACTA<br>ATTATGCTCTCTTGAAATTGGCTGGAGAT<br>GTTGAGAGCAACCCAGGTCCCGTGAGCA<br>AGGGCGAGGAGCT |  |
|  |  |  | <i>R.GFP</i>      | GCTCTAGATTACTTGTACAGCTCGTCCAT                                                                                  |  |
