# Supplementary material for: Production of Astaxanthin by Animal Cells via Introduction of an Entire Astaxanthin Biosynthetic Pathway
Source: MDPI journal article supplement (doi:10.3390/bioengineering10091073), 2023-09-11
Supplement: s1 [file s1]

**Table S4.** Compositions and contents of total-ketocarotenoids in HEK293T cells. Data ( $\mu\text{g/g}$  DW, gram of dry weight).

| Samples                 | TOTAL-KETOCAROTEN  | MIN-total-keto     | SD  | Compared to             | One way ANOVA, <i>P-values</i> |
|-------------------------|--------------------|--------------------|-----|-------------------------|--------------------------------|
|                         | $\mu\text{g/g}$ DW | $\mu\text{g/g}$ DW |     |                         |                                |
| pbK3HZ-2A+beta-carotene | 49.0               | 40.2               | 7.6 | pWZG-2A+beta-carotene   |                                |
|                         | 34.8               |                    |     |                         |                                |
|                         | 36.9               |                    |     |                         |                                |
| pC1HZG-2A+beta-carotene | 56.6               | 55.6               | 7.3 | pbK3HZ-2A+beta-carotene |                                |
|                         | 62.4               |                    |     |                         |                                |
|                         | 47.9               |                    |     |                         |                                |
| pWZG-2A+beta-carotene   | 75.1               | 74.2               | 2.2 | pbK3HZ-2A+beta-carotene |                                |
|                         | 71.7               |                    |     |                         |                                |
|                         | 75.8               |                    |     |                         |                                |
| pWZg2R-2A+beta-carotene | 88.9               | 90.4               | 1.8 | pWZG-2A+beta-carotene   | **                             |
|                         | 92.4               |                    |     |                         |                                |
|                         | 90.0               |                    |     |                         |                                |
| pWZg1R-2A+beta-carotene | 140.4              | 140.2              | 5.5 | pWZG-2A+beta-carotene   | ***                            |
|                         | 145.6              |                    |     |                         |                                |
|                         | 134.6              |                    |     |                         |                                |
| pPLXG+pWZg1R            | 38.2               | 43.5               | 5.9 | pPYLG+pWZg1R            |                                |
|                         | 42.4               |                    |     |                         |                                |
|                         | 49.9               |                    |     |                         |                                |
| pAPLG+pWZg1R            | 50.8               | 51.7               | 1.7 | pPLXG+pWZg1R            |                                |
|                         | 53.7               |                    |     |                         |                                |
|                         | 50.8               |                    |     |                         |                                |
| pPYLG+pWZg1R            | 59.6               | 63.2               | 3.1 | pPLXG+pWZg1R            | **                             |
|                         | 65.3               |                    |     |                         |                                |
|                         | 64.8               |                    |     |                         |                                |
| pPLXG+pWZg1R+GGPP       | 78.4               | 74.9               | 4.2 | pPLXG+pWZg1R            | **                             |
|                         | 70.2               |                    |     |                         |                                |
|                         | 76.0               |                    |     |                         |                                |
| pAPLG+pWZg1R+GGPP       | 119.7              | 124.4              | 5.0 | pAPLG+pWZg1R            | ***                            |
|                         | 123.7              |                    |     |                         |                                |
|                         | 129.8              |                    |     |                         |                                |
| pPYLG+pWZg1R+GGPP       | 212.6              | 207.2              | 5.1 | pPYLG+pWZg1R            | ***                            |
|                         | 202.4              |                    |     |                         |                                |
|                         | 206.5              |                    |     |                         |                                |
| pPLXG+pWZg1R+ZR+GGPP    | 161.1              | 154.6              | 7.3 | pPLXG+pWZg1R            | ***                            |
|                         | 146.7              |                    |     |                         |                                |
|                         | 156.0              |                    |     |                         |                                |
| pAPLG+pWZg1R+ZR+GGPP    | 191.6              | 196.0              | 7.7 | pAPLG+pWZg1R            | ***                            |
|                         | 191.5              |                    |     |                         |                                |
|                         | 204.8              |                    |     |                         |                                |
| pPYLG+pWZg1R+ZR+GGPP    | 267.1              | 262.1              | 4.3 | pPYLG+pWZg1R            | ***                            |

|  |       |  |  |  |  |
|--|-------|--|--|--|--|
|  | 259.0 |  |  |  |  |
|  | 260.2 |  |  |  |  |

P < 0.05, P < 0.01 and P < 0.001 are tagged as \*, \*\*, and \*\*\*, respectively. ND, not detectable. The total-ketocarotenoids is the sum of E (*trans*) and Z (*cis*) isomers.
