# Supplementary material for: Production of Astaxanthin by Animal Cells via Introduction of an Entire Astaxanthin Biosynthetic Pathway
Source: MDPI journal article supplement (doi:10.3390/bioengineering10091073), 2023-09-11
Supplement: s1 [file s1]

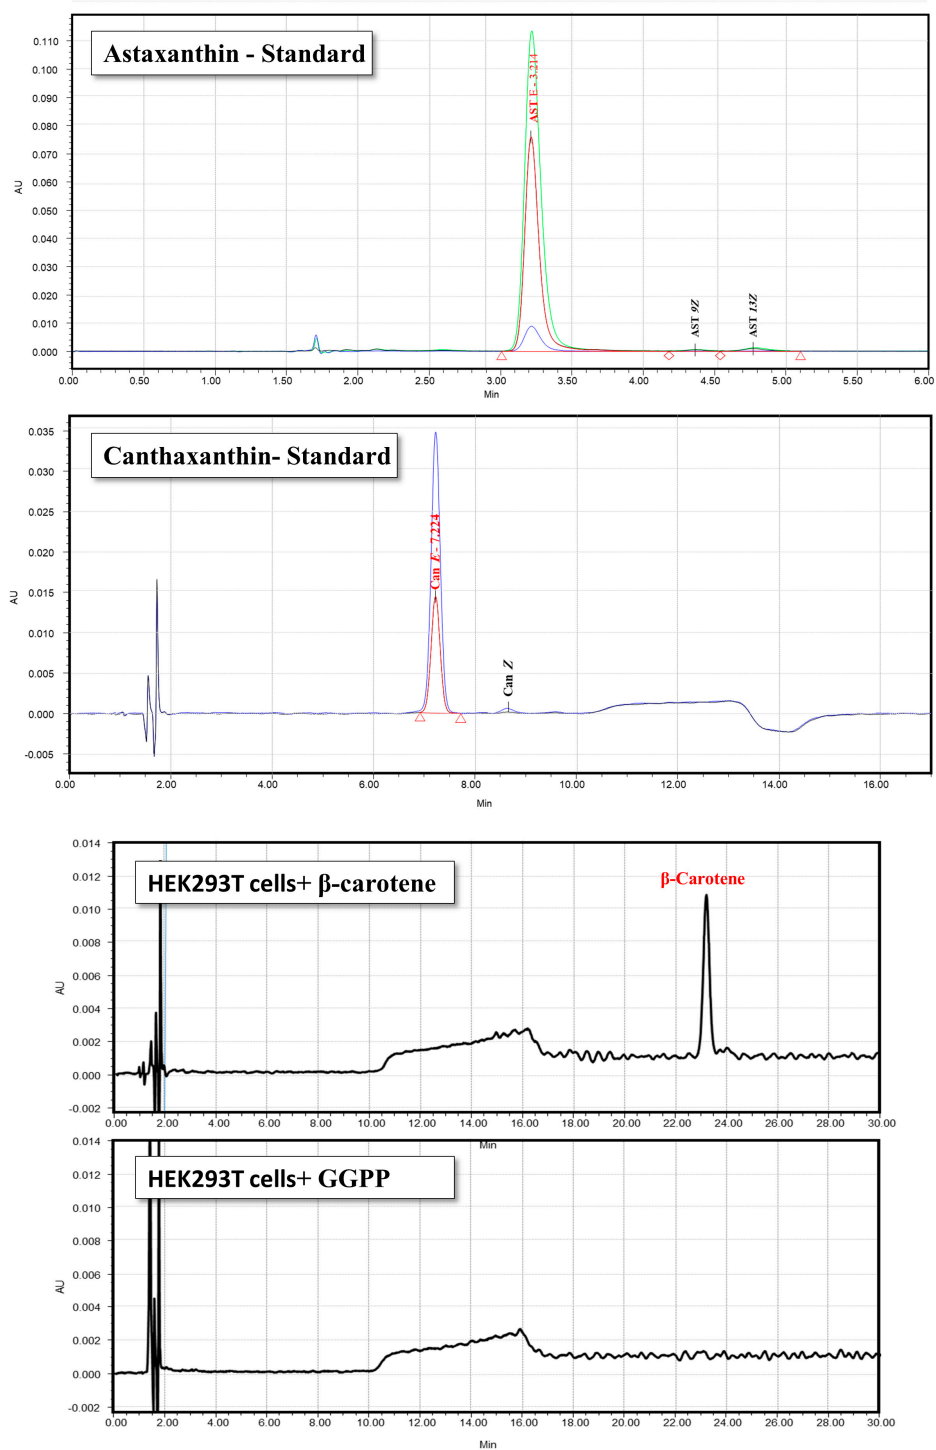

**Fig S1.** RP- HPLC chromatogram of Astaxanthin (Ast) and Canthaxanthin (Can); *E*, *trans* geometric isomer; *Z*, *cis* geometric isomer; Control sample for HEK293T cells supplied with  $\beta$ -carotene, and GGPP.
