# Supplementary material for: Production of Astaxanthin by Animal Cells via Introduction of an Entire Astaxanthin Biosynthetic Pathway
Source: MDPI journal article supplement (doi:10.3390/bioengineering10091073), 2023-09-11
Supplement: s1 [file s1]

**Table S2.** Compositions and contents of total astaxanthin in HEK293T cells. Data ( $\mu\text{g/g}$  DW, gram of dry weight).

| Samples                 | Ast-E                      | Ast-Z              | Total-Ast          | MIN-TOTLA-AST      | SD  | Compared to             | One way ANOVA, <i>P</i> -values |
|-------------------------|----------------------------|--------------------|--------------------|--------------------|-----|-------------------------|---------------------------------|
|                         | ASTX<br>$\mu\text{g/g}$ DW | $\mu\text{g/g}$ DW | $\mu\text{g/g}$ DW | $\mu\text{g/g}$ DW |     |                         |                                 |
| pbK3HZ-2A+beta-carotene | ND                         | 9.4                | 9.4                | 3.1                | 5.4 | pWZG-2A+beta-carotene   |                                 |
|                         | ND                         | ND                 | ND                 |                    |     |                         |                                 |
|                         | ND                         | ND                 | ND                 |                    |     |                         |                                 |
| pC1HZG-2A+beta-carotene | 19.3                       | ND                 | 19.3               | 17.8               | 1.5 | pbK3HZ-2A+beta-carotene | **                              |
|                         | 16.3                       | ND                 | 16.3               |                    |     |                         |                                 |
|                         | 17.8                       | ND                 | 17.8               |                    |     |                         |                                 |
| pWZG-2A+beta-carotene   | 32.9                       | ND                 | 32.9               | 31.6               | 1.3 | pbK3HZ-2A+beta-carotene | **                              |
|                         | 30.3                       | ND                 | 30.3               |                    |     |                         |                                 |
|                         | 31.6                       | ND                 | 31.6               |                    |     |                         |                                 |
| pWZg2R-2A+beta-carotene | 31.3                       | ND                 | 31.3               | 32.5               | 1.3 | pWZG-2A+beta-carotene   |                                 |
|                         | 33.8                       | ND                 | 33.8               |                    |     |                         |                                 |
|                         | 32.5                       | ND                 | 32.5               |                    |     |                         |                                 |
| pWZg1R-2A+beta-carotene | 25.2                       | ND                 | 25.2               | 34.1               | 8.5 | pWZG-2A+beta-carotene   |                                 |
|                         | 35.0                       | ND                 | 35.0               |                    |     |                         |                                 |
|                         | 12.5                       | 29.6               | 42.1               |                    |     |                         |                                 |
| pPLXG+pWZg1R            | 17.9                       | ND                 | 17.9               | 21.7               | 5.1 | pPYLG+pWZg1R            |                                 |
|                         | 19.7                       | ND                 | 19.7               |                    |     |                         |                                 |
|                         | 27.6                       | ND                 | 27.6               |                    |     |                         |                                 |
| pAPLG+pWZg1R            | 12.2                       | 21.1               | 33.3               | 31.4               | 2.0 | pPLXG+pWZg1R            | *                               |
|                         | ND                         | 31.6               | 31.6               |                    |     |                         |                                 |
|                         | ND                         | 29.3               | 29.3               |                    |     |                         |                                 |
| pPYLG+pWZg1R            | 21.4                       | 19.2               | 40.6               | 41.9               | 1.3 | pPLXG+pWZg1R            | ***                             |
|                         | 22.8                       | 20.4               | 43.2               |                    |     |                         |                                 |
|                         | ND                         | 41.8               | 41.8               |                    |     |                         |                                 |
| pPLXG+pWZg1R+GGPP       | 19.7                       | ND                 | 19.7               | 19.5               | 1.1 | pPLXG+pWZg1R            | ***                             |
|                         | 18.3                       | ND                 | 18.3               |                    |     |                         |                                 |
|                         | 20.5                       | ND                 | 20.5               |                    |     |                         |                                 |
| pAPLG+pWZg1R+GGPP       | 21.7                       | 11.6               | 33.2               | 43.2               | 8.7 | pAPLG+pWZg1R            | ***                             |
|                         | 40.0                       | 7.5                | 47.4               |                    |     |                         |                                 |
|                         | 41.5                       | 7.5                | 49.0               |                    |     |                         |                                 |
| pPYLG+pWZg1R+GGPP       | 38.7                       | 20.4               | 59.1               | 54.1               | 5.0 | pPYLG+pWZg1R            | *                               |
|                         | 49.2                       | ND                 | 49.2               |                    |     |                         |                                 |
|                         | 44.8                       | 9.2                | 54.5               |                    |     |                         |                                 |
| pPLXG+pWZg1R+ZR+GGPP    | ND                         | 152.4              | 152.4              | 146.4              | 7.8 | pPLXG+pWZg1R            | ***                             |
|                         | ND                         | 137.6              | 137.6              |                    |     |                         |                                 |
|                         | ND                         | 149.2              | 149.2              |                    |     |                         |                                 |
| pAPLG+pWZg1R+ZR+GGPP    | ND                         | 134.7              | 134.7              | 136.7              | 2.1 | pAPLG+pWZg1R            | ***                             |
|                         | ND                         | 138.8              | 138.8              |                    |     |                         |                                 |

|                             |    |       |       |       |     |              |     |
|-----------------------------|----|-------|-------|-------|-----|--------------|-----|
|                             | ND | 136.7 | 136.7 |       |     |              |     |
| <b>pPYLG+pWZg1R+ZR+GGPP</b> | ND | 239.3 | 239.3 | 232.8 | 6.0 | pPYLG+pWZg1R | *** |
|                             | ND | 227.6 | 227.6 |       |     |              |     |
|                             | ND | 231.5 | 231.5 |       |     |              |     |

P < 0.05, P < 0.01 and P < 0.001 are tagged as \*, \*\*, and \*\*\*, respectively. ND, not detectable. Astaxanthin is the sum of *E (trans)* and *Z (cis)* isomers.
